# Supplementary material for: Comprehensive Versus Usual Community Care for First-Episode Psychosis: 2-Year Outcomes From the NIMH RAISE Early Treatment Program
Source: Atypon-hosted journal article supplement (doi:10.1176/appi.ajp.2015.15050632), 2015-10-20
Supplement: appi.ajp.2015.15050632.ds001.pdf [file appi.ajp.2015.15050632.ds001.pdf]

Figure S1. Participant Flow

NAVIGATE SITES

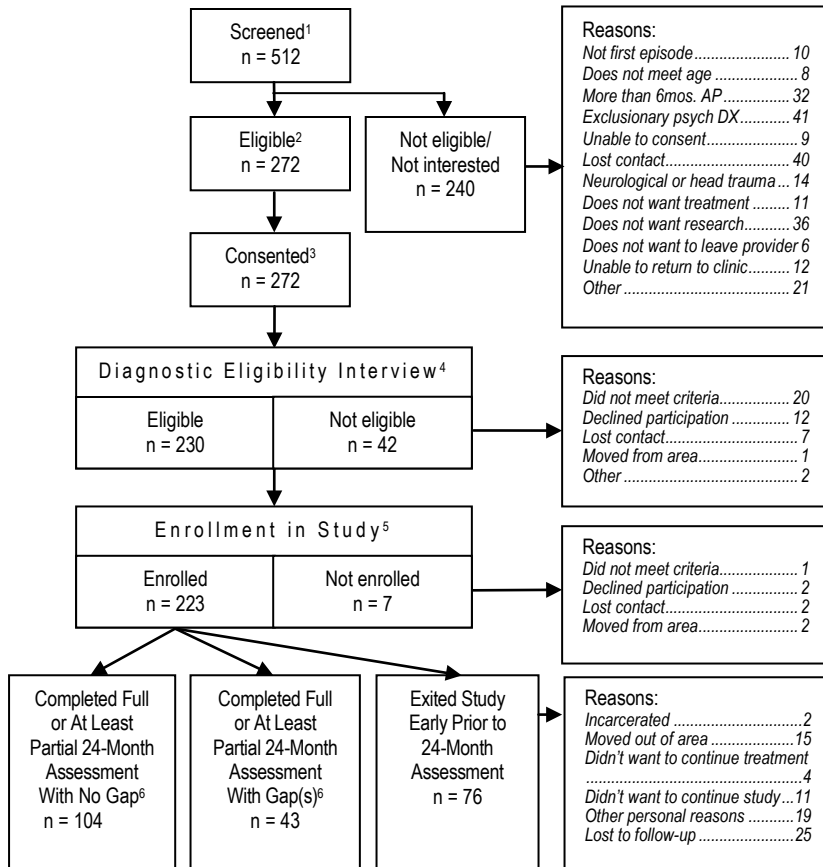

## COMMUNITY CARE SITES

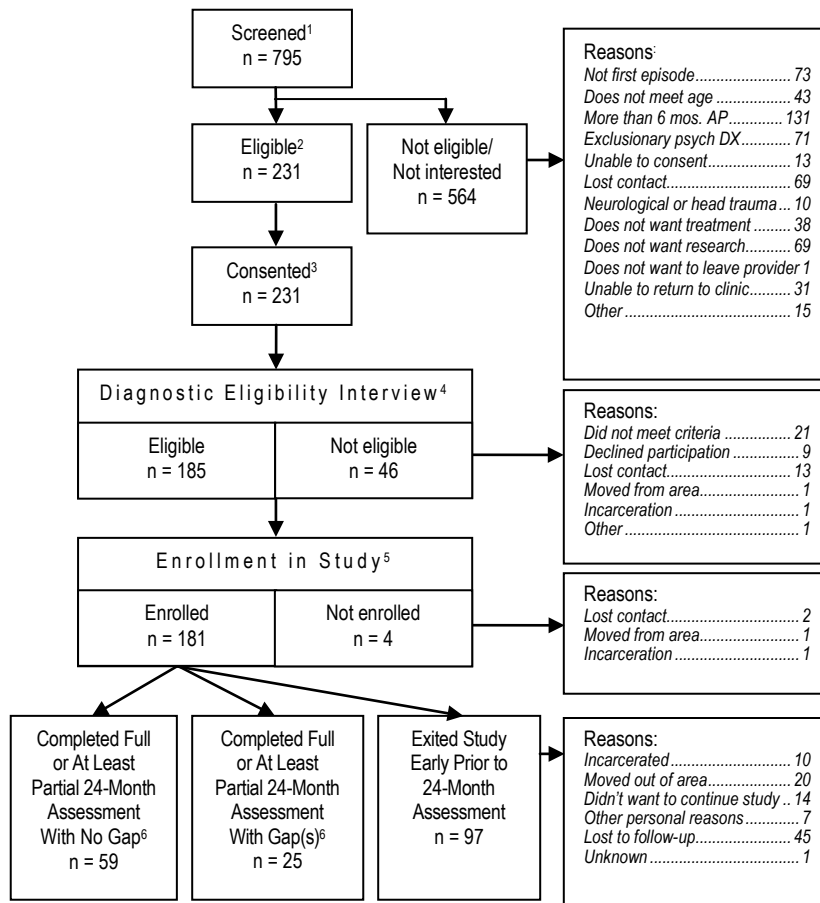

<sup>1</sup>Potential research subjects contacted by research staff.

<sup>2</sup>Potential subjects meeting brief (pre-consent) checklist.

<sup>3</sup>Potential subjects who signed informed consent and agreed to participate in study if eligibility criteria are met.

<sup>4</sup>After consent, subjects submit to diagnostic eligibility interview during which major inclusion and exclusion criteria are assessed.

<sup>5</sup>For subjects meeting eligibility on the diagnostic interview, enrollment into treatment occurs at the end of the Baseline 2 visit, during which the final eligibility criteria are assessed.

<sup>6</sup>A Gap is defined as missing greater than 3 consecutive scheduled monthly assessment visits. (Note that these subjects returned on or before the Month 24 Assessment)

Figure S2. Time to last documented mental health visit

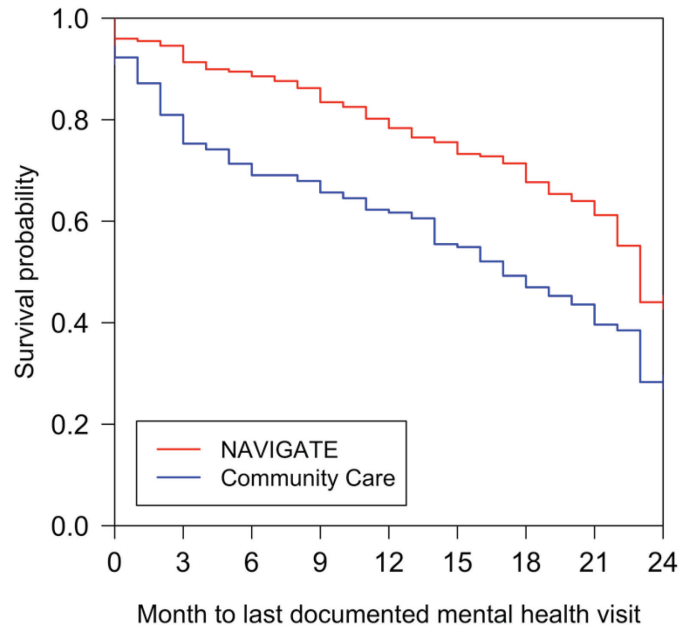

For treatment,  $\chi^2 = 8.41$  and p-value=0.0037 based on the proportional hazards model adjusted for gender, student, and PANSS at baseline and for clustering.

Figure S3. Percent with any work or school days per month

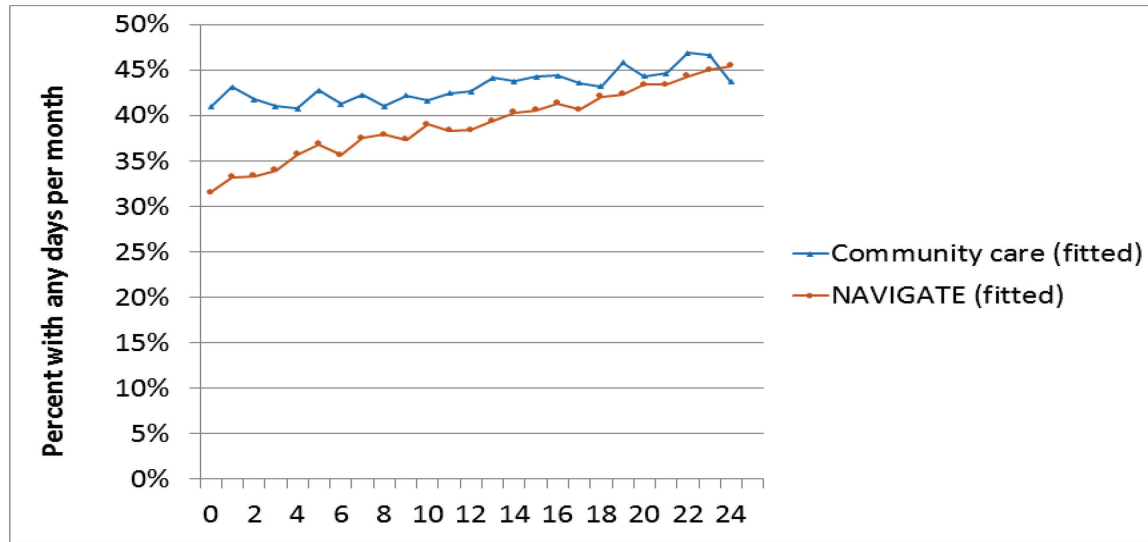

Group by time interaction:  $p=.044$

Table S1. The estimated model-based scores over time: means and standard errors

|                                                               |     | Baseline |                | Month 6 |                | Month 12 |                | Month 18 |                | Month 24 |                |
|---------------------------------------------------------------|-----|----------|----------------|---------|----------------|----------|----------------|----------|----------------|----------|----------------|
| <b>Heinrichs-Carpenter Quality of Life Scale</b>              |     |          |                |         |                |          |                |          |                |          |                |
| Number of Community Care (CC) participants                    |     | N=181    |                | N=126   |                | N=109    |                | N=85     |                | N=76     |                |
| Number of NAVIGATE (NAV) participants                         |     | N=222    |                | N=165   |                | N=148    |                | N=132    |                | N=129    |                |
|                                                               |     | Mean     | Standard error | Mean    | Standard error | Mean     | Standard error | Mean     | Standard error | Mean     | Standard error |
| Total score <sup>a,b,c</sup>                                  | CC  | 55.13    | 0.89           | 60.08   | 1.12           | 62.12    | 1.40           | 63.70    | 1.66           | 65.02    | 1.88           |
|                                                               | NAV | 51.25    | 0.89           | 59.15   | 1.00           | 62.42    | 1.21           | 64.93    | 1.41           | 67.05    | 1.59           |
| <b>Subscales</b>                                              |     |          |                |         |                |          |                |          |                |          |                |
| Interpersonal relations <sup>a,b,c</sup>                      | CC  | 20.61    | 0.42           | 22.36   | 0.48           | 23.08    | 0.58           | 23.64    | 0.67           | 24.11    | 0.75           |
|                                                               | NAV | 19.27    | 0.42           | 22.11   | 0.43           | 23.29    | 0.50           | 24.20    | 0.57           | 24.96    | 0.63           |
| Instrumental role <sup>a,b,c,e</sup>                          | CC  | 7.16     | 0.47           | 8.87    | 0.48           | 9.58     | 0.57           | 10.12    | 0.66           | 10.58    | 0.75           |
|                                                               | NAV | 4.81     | 0.44           | 7.44    | 0.43           | 8.53     | 0.51           | 9.37     | 0.58           | 10.08    | 0.65           |
| Intrapsychic foundations <sup>a,b,c</sup>                     | CC  | 21.54    | 0.35           | 22.61   | 0.37           | 23.06    | 0.45           | 23.40    | 0.52           | 23.68    | 0.59           |
|                                                               | NAV | 20.39    | 0.34           | 22.24   | 0.34           | 23.00    | 0.39           | 23.59    | 0.44           | 24.09    | 0.49           |
| Common objects and activities <sup>a,b,c</sup>                | CC  | 6.59     | 0.15           | 7.08    | 0.15           | 7.28     | 0.16           | 7.43     | 0.18           | 7.56     | 0.19           |
|                                                               | NAV | 6.38     | 0.15           | 7.10    | 0.14           | 7.40     | 0.15           | 7.63     | 0.15           | 7.83     | 0.16           |
| <b>Positive and Negative Syndrome Scale (PANSS)</b>           |     |          |                |         |                |          |                |          |                |          |                |
| Total score <sup>a,b,e</sup>                                  | CC  | 74.69    | 1.05           | 69.70   | 1.16           | 67.63    | 1.32           | 66.04    | 1.46           | 64.70    | 1.60           |
|                                                               | NAV | 77.54    | 0.94           | 70.38   | 1.05           | 67.41    | 1.17           | 65.14    | 1.29           | 63.22    | 1.40           |
| <b>PANSS Factor scores (30)</b>                               |     |          |                |         |                |          |                |          |                |          |                |
| Positive <sup>a,b,e</sup>                                     | CC  | 12.01    | 0.31           | 10.75   | 0.27           | 10.23    | 0.29           | 9.83     | 0.32           | 9.49     | 0.35           |
|                                                               | NAV | 12.04    | 0.28           | 10.67   | 0.24           | 10.10    | 0.25           | 9.67     | 0.27           | 9.30     | 0.29           |
| Negative <sup>a,b,e</sup>                                     | CC  | 16.35    | 0.40           | 15.78   | 0.39           | 15.21    | 0.43           | 14.64    | 0.49           | 14.07    | 0.59           |
|                                                               | NAV | 16.83    | 0.36           | 16.09   | 0.36           | 15.34    | 0.38           | 14.60    | 0.43           | 13.86    | 0.50           |
| Disorganized/concrete <sup>a,b,e</sup>                        | CC  | 7.29     | 0.22           | 6.93    | 0.18           | 6.78     | 0.19           | 6.66     | 0.21           | 6.57     | 0.24           |
|                                                               | NAV | 8.00     | 0.21           | 7.30    | 0.16           | 7.01     | 0.17           | 6.79     | 0.19           | 6.60     | 0.21           |
| Excited <sup>a,b,e</sup>                                      | CC  | 6.40     | 0.19           | 6.28    | 0.13           | 6.23     | 0.15           | 6.19     | 0.18           | 6.16     | 0.21           |
|                                                               | NAV | 6.96     | 0.17           | 6.49    | 0.11           | 6.29     | 0.12           | 6.14     | 0.15           | 6.02     | 0.17           |
| Depressed <sup>a,b,e</sup>                                    | CC  | 7.94     | 0.26           | 7.49    | 0.28           | 7.30     | 0.31           | 7.16     | 0.34           | 7.04     | 0.37           |
|                                                               | NAV | 7.88     | 0.23           | 7.05    | 0.26           | 6.71     | 0.29           | 6.45     | 0.31           | 6.22     | 0.33           |
| <b>Clinical Global Impressions Severity Scale<sup>c</sup></b> |     |          |                |         |                |          |                |          |                |          |                |

|                                                           |     |      |      |      |      |      |      |      |      |      |      |
|-----------------------------------------------------------|-----|------|------|------|------|------|------|------|------|------|------|
|                                                           | CC  | 3.94 | 0.03 | 3.64 | 0.04 | 3.51 | 0.05 | 3.42 | 0.06 | 3.34 | 0.07 |
|                                                           | NAV | 4.09 | 0.03 | 3.72 | 0.03 | 3.56 | 0.04 | 3.44 | 0.05 | 3.34 | 0.06 |
| Calgary Depression Scale for Schizophrenia <sup>a,c</sup> |     |      |      |      |      |      |      |      |      |      |      |
|                                                           | CC  | 4.52 | 0.24 | 3.93 | 0.21 | 3.68 | 0.24 | 3.49 | 0.26 | 3.33 | 0.29 |
|                                                           | NAV | 4.71 | 0.24 | 3.72 | 0.20 | 3.31 | 0.21 | 3.00 | 0.22 | 2.73 | 0.24 |

CC = Community Care; NAV = NAVIGATE; These means are based on a linear mixed effects model with random intercepts and slopes at the individual and site level with repeated measures. In addition to the interaction of square root of time by treatment, models included co-variables of gender<sup>a</sup>; student status<sup>b</sup>, PANSS<sup>c</sup>, number of prior hospitalizations (0, 1, 2, 3 or more)<sup>d</sup>, and/or main treatment effect<sup>e</sup> as indicated.

Table S2: Estimates of duration of untreated psychosis (DUP) moderation of treatment effect on Heinrichs-Carpenter Quality of Life and Positive and Negative Syndrome Scale (PANSS) scores with DUP and DUP x time x treatment interaction.

| Moderation by DUP                                            |                |     |                |         |          |          |          |                                  |       |           |                                                    |       |           |                               |         |
|--------------------------------------------------------------|----------------|-----|----------------|---------|----------|----------|----------|----------------------------------|-------|-----------|----------------------------------------------------|-------|-----------|-------------------------------|---------|
|                                                              |                |     | Estimated mean |         |          |          |          | Change from baseline at 24 month |       |           | Differential change between CC and NAV at 24 month |       |           | Treatment by time interaction |         |
|                                                              |                |     | Baseline       | Month 6 | Month 12 | Month 18 | Month 24 | Mean                             | SE    | Cohen's d | Mean                                               | SE    | Cohen's d | t                             | p-value |
| Heinrichs-Carpenter Quality of Life Total score <sup>1</sup> | DUP ≤ 74 weeks | CC  | 54.88          | 59.83   | 61.88    | 63.45    | 64.78    | 9.896                            | 1.934 | 0.53      | 10.064                                             | 2.782 | 0.54      | 3.62                          | 0.0003  |
|                                                              |                | NAV | 51.01          | 60.99   | 65.12    | 68.30    | 70.97    | 19.959                           | 2.142 | 1.06      |                                                    |       |           |                               |         |
|                                                              | DUP > 74 weeks | CC  | 55.34          | 60.29   | 62.33    | 63.91    | 65.23    | 9.896                            | 1.934 | 0.53      | 1.307                                              | 2.880 | 0.07      | 0.45                          | 0.6500  |
|                                                              |                | NAV | 51.47          | 57.07   | 59.39    | 61.17    | 62.67    | 11.203                           | 2.281 | 0.60      |                                                    |       |           |                               |         |
| PANSS Total score <sup>2</sup>                               | DUP ≤ 74 weeks | CC  | 71.70          | 66.79   | 64.75    | 63.19    | 61.87    | -9.828                           | 1.387 | -0.65     | -6.297                                             | 2.054 | -0.42     | -3.07                         | 0.0023  |
|                                                              |                | NAV | 74.79          | 66.73   | 63.39    | 60.83    | 58.67    | -6.125                           | 1.514 | -1.07     |                                                    |       |           |                               |         |
|                                                              | DUP > 74 weeks | CC  | 77.35          | 72.44   | 70.40    | 68.84    | 67.52    | -9.828                           | 1.387 | -0.65     | -1.953                                             | 2.142 | -0.13     | -0.91                         | 0.3622  |
|                                                              |                | NAV | 80.44          | 74.55   | 72.11    | 70.24    | 68.66    | -11.781                          | 1.632 | -0.78     |                                                    |       |           |                               |         |

CC=Community Care; NAV=Navigate

<sup>1</sup>For Heinrichs-Carpenter Quality of Life total score, model with DUP and the DUP x square root of time x treatment interaction t statistic is -2.98 with p-value 0.0030.

<sup>2</sup>For PANSS total score, model with DUP and the DUP x square root of time x treatment interaction t statistic is 2.03 with p-value 0.0426.
